# Supplementary material for: Tuning the solid state emission of meso-Me3SiC6H4 BODIPYs by tuning their solid state structure
Source: Royal Society of Chemistry journal article supplement (doi:10.1039/c3tc30632a), 2013-01-01
Supplement: c3tc30632a.pdf [file c3tc30632a.pdf]

## Supporting Information

# Tuning the Solid State Emission of Meso -Me<sub>3</sub>SiC<sub>6</sub>H<sub>4</sub> BODIPYs by Tuning Their Solid State Structure

Chinna Ayya Swamy P, Sanjoy Mukherjee and Pakkirisamy Thilagar\*

*Department of Inorganic and Physical Chemistry, Indian Institute of Science, Bangalore-  
560012, India.*

*E-mail: [thilagar@ipc.iisc.ernet.in](mailto:thilagar@ipc.iisc.ernet.in)*

## Table of Contents

- |                                                    |            |
|----------------------------------------------------|------------|
| 1) Crystallographic data table for <b>4, 6-9</b> : | Page S2    |
| 2) DFT computational data for <b>4-9</b> :         | Page S3-S8 |

**Table S1:** Crystallographic data for **4** and **6-9**

|                                   | <b>4</b>                                                        | <b>6</b>                                         | <b>7</b>                                         | <b>8</b>                                         | <b>9</b>                                         |
|-----------------------------------|-----------------------------------------------------------------|--------------------------------------------------|--------------------------------------------------|--------------------------------------------------|--------------------------------------------------|
| Empirical formula                 | C <sub>20</sub> H <sub>23</sub> B F <sub>2</sub> N <sub>2</sub> | C <sub>20</sub> H <sub>23</sub> B F <sub>2</sub> | C <sub>22</sub> H <sub>27</sub> B F <sub>2</sub> | C <sub>22</sub> H <sub>27</sub> B F <sub>2</sub> | C <sub>22</sub> H <sub>27</sub> B F <sub>2</sub> |
| Formula weight                    | Si<br>368.3                                                     | N <sub>2</sub> Si<br>368.3                       | N <sub>2</sub> Si<br>396.36                      | N <sub>2</sub> Si<br>396.36                      | N <sub>2</sub> Si<br>396.36                      |
| Temperature(k)                    | 293(2)                                                          | 293(2)                                           | 296(2)                                           | 296(2)                                           | 273(2)                                           |
| Wavelength                        | 0.71073 Å                                                       | 0.71073 Å                                        | 0.71073 Å                                        | 0.71073 Å                                        | 0.71073 Å                                        |
| space group                       | P2(1)/c                                                         | P2(1)/c                                          | P-1                                              | Pna2(1)                                          | P-1                                              |
| a/ Å                              | 9.301(4)                                                        | 6.880(3)                                         | 9.0644(18)                                       | 30.7303(15)                                      | 8.957(4)                                         |
| b/ Å                              | 12.332(5)                                                       | 10.870(5)                                        | 13.838(3)                                        | 6.5809(3)                                        | 14.264(7)                                        |
| c/ Å                              | 17.567(7)                                                       | 26.448(12)                                       | 17.166(3)                                        | 20.9330(10)                                      | 17.227(8)                                        |
| α/deg                             | 90                                                              | 90                                               | 84.182(9)                                        | 90                                               | 81.589(9)                                        |
| β/deg                             | 103.820(9)                                                      | 93.084(9)                                        | 89.033(10)                                       | 90                                               | 88.643(8)                                        |
| γ/deg                             | 90                                                              | 90                                               | 78.190(9)                                        | 90                                               | 87.439(9)                                        |
| V/Å <sup>3</sup>                  | 1956.7(14)                                                      | 1975.1(16)                                       | 2096.8(7)                                        | 4233.3(3)                                        | 2174.7(18)                                       |
| Crystal size                      | 0.15 x 0.09 x<br>0.05 mm                                        | 0.1 x 0.08 x<br>0.06 mm                          | 0.12 x 0.08 x<br>0.05 mm                         | 0.12 x 0.09 x<br>0.06 mm                         | 0.1 x 0.08 x<br>0.06 mm                          |
| z                                 | 4                                                               | 4                                                | 4                                                | 8                                                | 4                                                |
| Dc, g cm <sup>-3</sup>            | 1.25                                                            | 1.239                                            | 1.256                                            | 1.244                                            | 1.211                                            |
| Final R<br>[I>2σ(I)]              | R1 = 0.1272,<br>wR2 = 0.3024                                    | R1 = 0.1176,<br>wR2 = 0.2670                     | R1 = 0.1080,<br>wR2 = 0.2556                     | R1 = 0.0686,<br>wR2 =<br>0.1624                  | R1 = 0.0870,<br>wR2 =<br>0.2063                  |
| R (all data)                      | R1 = 0.3129,<br>wR2 = 0.3528                                    | R1 = 0.1964,<br>wR2 = 0.3110                     | R1 = 0.1584,<br>wR2 = 0.2772                     | R1 = 0.0965,<br>wR2 =<br>0.1849                  | R1 = 0.1493,<br>wR2 =<br>0.2428                  |
| Reflections collected             | 20558                                                           | 22422                                            | 43472                                            | 82961                                            | 24860                                            |
| Theta range for data collection   | 2.04 to 28.06 deg.                                              | 1.54 to 27.99 deg                                | 1.19 to 30.66 deg                                | 1.33 to 30.64 deg                                | 1.74 to 28.09 deg.                               |
| Absorption coefficient            | 0.144 mm <sup>-1</sup>                                          | 0.142 mm <sup>-1</sup>                           | 0.139 mm <sup>-1</sup>                           | 0.138 mm <sup>-1</sup>                           | 0.134mm <sup>-1</sup>                            |
| Goodness-of-fit on F <sup>2</sup> | 1.053                                                           | 1.036                                            | 1.104                                            | 1.019                                            | 1.066                                            |

**Table S2.** Computed Structure of **4**.  
**4** Energy = -1399.83666977 a.u. (-38090.96 eV)

| Center<br>Number | Atomic<br>Number | Coordinates (Angstroms) |           |           |
|------------------|------------------|-------------------------|-----------|-----------|
|                  |                  | X                       | Y         | Z         |
| 1                | 14               | -5.491163               | -0.000860 | -0.000981 |
| 2                | 7                | 2.850749                | -1.248387 | 0.028023  |
| 3                | 7                | 2.841264                | 1.253820  | -0.027147 |
| 4                | 5                | 3.776927                | 0.006230  | 0.000102  |
| 5                | 9                | 4.581624                | 0.033199  | 1.147995  |
| 6                | 9                | 4.580982                | -0.014715 | -1.148385 |
| 7                | 6                | -3.590235               | -0.023229 | -0.007189 |
| 8                | 6                | -2.849470               | -0.701408 | -0.992224 |
| 9                | 1                | -3.364072               | -1.241393 | -1.782503 |
| 10               | 6                | -1.453151               | -0.704225 | -0.991953 |
| 11               | 1                | -0.911850               | -1.227012 | -1.774728 |
| 12               | 6                | -0.738305               | -0.011095 | -0.002131 |
| 13               | 6                | -1.462483               | 0.676467  | 0.986961  |
| 14               | 1                | -0.927669               | 1.201824  | 1.772455  |
| 15               | 6                | -2.857056               | 0.660674  | 0.982183  |
| 16               | 1                | -3.378482               | 1.192801  | 1.774911  |
| 17               | 6                | 0.747221                | -0.005225 | -0.000191 |
| 18               | 6                | 1.454274                | -1.218473 | 0.044982  |
| 19               | 6                | 0.991075                | -2.556369 | 0.147217  |
| 20               | 1                | -0.044781               | -2.857339 | 0.203587  |
| 21               | 6                | 2.112343                | -3.374308 | 0.176548  |
| 22               | 1                | 2.138259                | -4.452909 | 0.248594  |
| 23               | 6                | 3.252093                | -2.537629 | 0.104358  |
| 24               | 6                | 1.445056                | 1.213377  | -0.044544 |
| 25               | 6                | 0.971778                | 2.547706  | -0.146792 |
| 26               | 1                | -0.066332               | 2.840823  | -0.203474 |
| 27               | 6                | 2.086867                | 3.374119  | -0.175635 |
| 28               | 1                | 2.104647                | 4.452894  | -0.247526 |
| 29               | 6                | 3.232891                | 2.546054  | -0.103435 |
| 30               | 6                | -6.090573               | 1.750588  | -0.399737 |
| 31               | 1                | -5.748719               | 2.069930  | -1.390597 |
| 32               | 1                | -5.717247               | 2.478476  | 0.329623  |
| 33               | 1                | -7.185890               | 1.801672  | -0.389616 |
| 34               | 6                | -6.110954               | -0.504082 | 1.715056  |
| 35               | 1                | -5.743476               | 0.173406  | 2.494096  |
| 36               | 1                | -5.783726               | -1.516837 | 1.975421  |
| 37               | 1                | -7.206580               | -0.485098 | 1.752861  |
| 38               | 6                | -6.146507               | -1.208601 | -1.300576 |
| 39               | 1                | -7.242708               | -1.213990 | -1.289382 |
| 40               | 1                | -5.810271               | -2.234311 | -1.111534 |
| 41               | 1                | -5.832723               | -0.931822 | -2.313474 |
| 42               | 6                | 4.666914                | 2.963043  | -0.113547 |
| 43               | 1                | 5.183849                | 2.606591  | 0.783247  |
| 44               | 1                | 5.191004                | 2.536057  | -0.974847 |
| 45               | 1                | 4.740769                | 4.051923  | -0.157304 |
| 46               | 6                | 4.689154                | -2.944020 | 0.114108  |
| 47               | 1                | 5.202692                | -2.585520 | -0.783846 |
| 48               | 1                | 5.210855                | -2.511606 | 0.974128  |
| 49               | 1                | 4.770969                | -4.032253 | 0.159741  |

**Table S3.** Computed Structure of **5**.  
**5** Energy = -1399.83685068 a.u. (-38090.96 eV)

| Center<br>Number | Atomic<br>Number | Coordinates (Angstroms) |           |           |
|------------------|------------------|-------------------------|-----------|-----------|
|                  |                  | X                       | Y         | Z         |
| 1                | 7                | 2.778851                | -1.049379 | 0.236037  |
| 2                | 7                | 2.277358                | 1.368473  | -0.173179 |
| 3                | 5                | 3.406890                | 0.378275  | 0.246898  |
| 4                | 9                | 3.864802                | 0.690092  | 1.535091  |
| 5                | 9                | 4.466864                | 0.444342  | -0.668073 |
| 6                | 6                | -3.523525               | -1.332717 | -1.363098 |
| 7                | 6                | -2.479599               | -1.901857 | -2.098702 |
| 8                | 1                | -2.698507               | -2.592400 | -2.908402 |
| 9                | 6                | -1.155128               | -1.584832 | -1.800347 |
| 10               | 1                | -0.344249               | -2.017561 | -2.377971 |
| 11               | 6                | -0.865285               | -0.679900 | -0.765100 |
| 12               | 6                | -1.927974               | -0.113387 | -0.041962 |
| 13               | 6                | -3.271318               | -0.428212 | -0.315830 |
| 14               | 6                | 0.542186                | -0.331860 | -0.436435 |
| 15               | 6                | 1.446219                | -1.340799 | -0.065055 |
| 16               | 6                | 1.254185                | -2.735844 | 0.112942  |
| 17               | 1                | 0.320810                | -3.261718 | -0.025572 |
| 18               | 6                | 2.474832                | -3.267917 | 0.505602  |
| 19               | 1                | 2.700803                | -4.301391 | 0.729471  |
| 20               | 6                | 3.401838                | -2.200158 | 0.577261  |
| 21               | 6                | 0.967552                | 1.005552  | -0.495826 |
| 22               | 6                | 0.274409                | 2.179823  | -0.889744 |
| 23               | 1                | -0.754112               | 2.218303  | -1.217637 |
| 24               | 6                | 1.170374                | 3.235329  | -0.786872 |
| 25               | 1                | 0.987023                | 4.277978  | -1.007168 |
| 26               | 6                | 2.405583                | 2.704014  | -0.343523 |
| 27               | 1                | -4.545963               | -1.602319 | -1.613849 |
| 28               | 1                | -1.684458               | 0.570922  | 0.767158  |
| 29               | 14               | -4.667599               | 0.353051  | 0.712595  |
| 30               | 6                | -6.334938               | -0.343610 | 0.154562  |
| 31               | 1                | -7.143458               | 0.099665  | 0.747570  |
| 32               | 1                | -6.541196               | -0.119852 | -0.898246 |
| 33               | 1                | -6.389516               | -1.430210 | 0.286469  |
| 34               | 6                | -4.386600               | -0.045636 | 2.540930  |
| 35               | 1                | -4.399047               | -1.127050 | 2.717114  |
| 36               | 1                | -3.423025               | 0.336736  | 2.896046  |
| 37               | 1                | -5.169940               | 0.404743  | 3.162064  |
| 38               | 6                | -4.642527               | 2.229561  | 0.462279  |
| 39               | 1                | -4.817123               | 2.492127  | -0.587250 |
| 40               | 1                | -5.420269               | 2.715653  | 1.063187  |
| 41               | 1                | -3.679328               | 2.661178  | 0.757465  |
| 42               | 6                | 4.842289                | -2.261474 | 0.967059  |
| 43               | 1                | 5.479737                | -1.865298 | 0.170142  |
| 44               | 1                | 5.031148                | -1.653844 | 1.858117  |
| 45               | 1                | 5.131538                | -3.294159 | 1.174117  |
| 46               | 6                | 3.682223                | 3.437962  | -0.094342 |
| 47               | 1                | 4.040953                | 3.263739  | 0.924972  |
| 48               | 1                | 4.469271                | 3.092858  | -0.773096 |
| 49               | 1                | 3.533592                | 4.510026  | -0.241488 |

**Table S4.** Computed Structure of **6**.  
**6** Energy = -1399.83025106 a.u. (-38090.78 eV)

| Center<br>Number | Atomic<br>Number | Coordinates (Angstroms) |           |           |
|------------------|------------------|-------------------------|-----------|-----------|
|                  |                  | X                       | Y         | Z         |
| 1                | 7                | 1.973539                | -1.236119 | 0.049804  |
| 2                | 7                | 1.809747                | 1.221662  | -0.403250 |
| 3                | 5                | 2.775183                | 0.102430  | 0.099935  |
| 4                | 9                | 3.175721                | 0.371848  | 1.416808  |
| 5                | 9                | 3.894997                | 0.023747  | -0.737924 |
| 6                | 6                | -4.172232               | -0.766509 | -2.034929 |
| 7                | 6                | -3.092948               | -1.027021 | -2.878686 |
| 8                | 1                | -3.254567               | -1.364739 | -3.898200 |
| 9                | 6                | -1.795012               | -0.850482 | -2.400041 |
| 10               | 1                | -0.946321               | -1.048557 | -3.048732 |
| 11               | 6                | -1.561440               | -0.408922 | -1.087229 |
| 12               | 6                | -2.640997               | -0.143830 | -0.207517 |
| 13               | 6                | -3.938551               | -0.339059 | -0.726400 |
| 14               | 1                | -4.798638               | -0.156285 | -0.089205 |
| 15               | 6                | -0.128105               | -0.236909 | -0.688879 |
| 16               | 6                | 0.628421                | -1.353241 | -0.311137 |
| 17               | 6                | 0.261573                | -2.719064 | -0.200081 |
| 18               | 1                | -0.719325               | -3.119384 | -0.413690 |
| 19               | 6                | 1.388770                | -3.408653 | 0.224286  |
| 20               | 1                | 1.480061                | -4.469414 | 0.413381  |
| 21               | 6                | 2.435036                | -2.464515 | 0.374529  |
| 22               | 6                | 0.469996                | 1.028764  | -0.752362 |
| 23               | 6                | -0.056024               | 2.275435  | -1.178112 |
| 24               | 1                | -1.067942               | 2.439006  | -1.520234 |
| 25               | 6                | 0.969759                | 3.205062  | -1.075960 |
| 26               | 1                | 0.930827                | 4.258199  | -1.318177 |
| 27               | 6                | 2.114787                | 2.525230  | -0.591471 |
| 28               | 1                | -5.190925               | -0.899378 | -2.388373 |
| 29               | 14               | -2.520184               | 0.460865  | 1.610986  |
| 30               | 6                | -4.102966               | -0.081944 | 2.504444  |
| 31               | 1                | -4.018168               | 0.170845  | 3.568133  |
| 32               | 1                | -5.000596               | 0.418681  | 2.125287  |
| 33               | 1                | -4.264628               | -1.163479 | 2.434320  |
| 34               | 6                | -2.435750               | 2.351586  | 1.658382  |
| 35               | 1                | -1.502978               | 2.728409  | 1.227762  |
| 36               | 1                | -3.268739               | 2.801375  | 1.105811  |
| 37               | 1                | -2.493884               | 2.705372  | 2.694964  |
| 38               | 6                | -1.053998               | -0.267838 | 2.553932  |
| 39               | 1                | -1.028495               | -1.360878 | 2.491702  |
| 40               | 1                | -0.087934               | 0.109635  | 2.208227  |
| 41               | 1                | -1.151754               | 0.002337  | 3.612828  |
| 42               | 6                | 3.840413                | -2.717405 | 0.811888  |
| 43               | 1                | 3.967190                | -3.768768 | 1.079249  |
| 44               | 1                | 4.547963                | -2.466831 | 0.014425  |
| 45               | 1                | 4.099002                | -2.095885 | 1.674976  |
| 46               | 6                | 3.468703                | 3.092336  | -0.316498 |
| 47               | 1                | 4.225644                | 2.615637  | -0.947680 |
| 48               | 1                | 3.471770                | 4.167572  | -0.508044 |
| 49               | 1                | 3.763015                | 2.914980  | 0.723022  |

**Table S5.** Computed Structure of **7**.  
**7** Energy = -1478.47355267 a.u. (-40230.74 eV)

| Center<br>Number | Atomic<br>Number | Coordinates (Angstroms) |           |           |
|------------------|------------------|-------------------------|-----------|-----------|
|                  |                  | X                       | Y         | Z         |
| 1                | 14               | 5.449396                | 0.000021  | -0.001106 |
| 2                | 7                | -2.887206               | -1.247639 | -0.001338 |
| 3                | 7                | -2.887041               | 1.247767  | -0.001443 |
| 4                | 5                | -3.812396               | 0.000123  | -0.002599 |
| 5                | 9                | -4.620722               | 0.000089  | -1.151871 |
| 6                | 9                | -4.623710               | 0.000266  | 1.144579  |
| 7                | 6                | 3.549015                | -0.000122 | 0.018567  |
| 8                | 6                | 2.808081                | -0.000168 | 1.214467  |
| 9                | 1                | 3.322254                | -0.000196 | 2.172090  |
| 10               | 6                | 1.410403                | -0.000182 | 1.214365  |
| 11               | 1                | 0.866759                | -0.000237 | 2.155450  |
| 12               | 6                | 0.700836                | -0.000140 | 0.007367  |
| 13               | 6                | 1.419909                | -0.000112 | -1.195977 |
| 14               | 1                | 0.882937                | -0.000079 | -2.140855 |
| 15               | 6                | 2.815730                | -0.000110 | -1.184408 |
| 16               | 1                | 3.336385                | -0.000119 | -2.140009 |
| 17               | 6                | -0.794731               | -0.000074 | 0.002438  |
| 18               | 6                | -1.485026               | -1.224497 | 0.000932  |
| 19               | 6                | -1.024772               | -2.584717 | 0.001856  |
| 20               | 6                | -2.169586               | -3.375832 | 0.000211  |
| 21               | 1                | -2.200828               | -4.457543 | 0.000352  |
| 22               | 6                | -3.299989               | -2.531718 | -0.001573 |
| 23               | 6                | -1.484865               | 1.224435  | 0.000997  |
| 24               | 6                | -1.024424               | 2.584593  | 0.001895  |
| 25               | 6                | -2.169130               | 3.375862  | 0.000039  |
| 26               | 1                | -2.200227               | 4.457576  | 0.000025  |
| 27               | 6                | -3.299649               | 2.531899  | -0.001843 |
| 28               | 6                | 6.059131                | 1.546111  | -0.907251 |
| 29               | 1                | 5.724144                | 2.459150  | -0.402406 |
| 30               | 1                | 5.687436                | 1.582309  | -1.937568 |
| 31               | 1                | 7.154573                | 1.568345  | -0.949998 |
| 32               | 6                | 6.059070                | -1.545404 | -0.908450 |
| 33               | 1                | 5.689017                | -1.579793 | -1.939421 |
| 34               | 1                | 5.722265                | -2.458771 | -0.405407 |
| 35               | 1                | 7.154553                | -1.568800 | -0.949465 |
| 36               | 6                | 6.104446                | -0.000657 | 1.772997  |
| 37               | 1                | 7.200661                | -0.000274 | 1.768112  |
| 38               | 1                | 5.779518                | -0.887298 | 2.329163  |
| 39               | 1                | 5.778928                | 0.885179  | 2.330104  |
| 40               | 6                | -4.739260               | 2.930152  | -0.003656 |
| 41               | 1                | -5.253767               | 2.530027  | -0.883215 |
| 42               | 1                | -5.255345               | 2.531890  | 0.875861  |
| 43               | 1                | -4.826384               | 4.018996  | -0.004814 |
| 44               | 6                | -4.739654               | -2.929773 | -0.003425 |
| 45               | 1                | -5.256128               | -2.530181 | 0.875241  |
| 46               | 1                | -5.253661               | -2.530836 | -0.883836 |
| 47               | 1                | -4.826928               | -4.018606 | -0.003142 |
| 48               | 6                | 0.376893                | 3.122320  | 0.003952  |
| 49               | 1                | 0.942205                | 2.797795  | 0.882921  |
| 50               | 1                | 0.944806                | 2.798114  | -0.873455 |
| 51               | 1                | 0.348889                | 4.215599  | 0.003983  |
| 52               | 6                | 0.376472                | -3.122636 | 0.003525  |
| 53               | 1                | 0.943991                | -2.798803 | -0.874283 |
| 54               | 1                | 0.942268                | -2.797898 | 0.882094  |
| 55               | 1                | 0.348316                | -4.215912 | 0.003903  |

**Table S6.** Computed Structure of **8**.  
**8** Energy = -1478.47361262 a.u. (-40230.75 eV)

| Center<br>Number | Atomic<br>Number | Coordinates (Angstroms) |           |           |
|------------------|------------------|-------------------------|-----------|-----------|
|                  |                  | X                       | Y         | Z         |
| 1                | 7                | -2.586971               | -1.247311 | -0.122881 |
| 2                | 7                | -2.586944               | 1.247348  | -0.122811 |
| 3                | 5                | -3.470633               | 0.000036  | -0.398801 |
| 4                | 9                | -3.900191               | 0.000070  | -1.736920 |
| 5                | 9                | -4.586584               | 0.000037  | 0.454748  |
| 6                | 6                | 3.527463                | -0.000121 | 1.724600  |
| 7                | 6                | 2.510379                | -0.000131 | 2.684218  |
| 8                | 1                | 2.760666                | -0.000180 | 3.741615  |
| 9                | 6                | 1.172254                | -0.000089 | 2.289340  |
| 10               | 1                | 0.379720                | -0.000093 | 3.032498  |
| 11               | 6                | 0.845523                | -0.000046 | 0.926157  |
| 12               | 6                | 1.876294                | -0.000023 | -0.022635 |
| 13               | 6                | 3.234160                | -0.000061 | 0.348821  |
| 14               | 6                | -0.585068               | -0.000020 | 0.488782  |
| 15               | 6                | -1.245812               | -1.224279 | 0.286254  |
| 16               | 6                | -0.806207               | -2.584604 | 0.421603  |
| 17               | 6                | -1.901676               | -3.375625 | 0.088436  |
| 18               | 1                | -1.931818               | -4.457354 | 0.080276  |
| 19               | 6                | -2.982546               | -2.531381 | -0.241797 |
| 20               | 6                | -1.245759               | 1.224261  | 0.286236  |
| 21               | 6                | -0.806097               | 2.584565  | 0.421587  |
| 22               | 6                | -1.901541               | 3.375633  | 0.088448  |
| 23               | 1                | -1.931624               | 4.457364  | 0.080241  |
| 24               | 6                | -2.982463               | 2.531432  | -0.241728 |
| 25               | 1                | 4.561154                | -0.000177 | 2.059964  |
| 26               | 1                | 1.599677                | 0.000015  | -1.075213 |
| 27               | 14               | 4.594170                | 0.000025  | -0.980879 |
| 28               | 6                | 6.293123                | -0.000708 | -0.150200 |
| 29               | 1                | 7.083332                | -0.000382 | -0.910045 |
| 30               | 1                | 6.441946                | 0.885236  | 0.477454  |
| 31               | 1                | 6.441646                | -0.887446 | 0.476407  |
| 32               | 6                | 4.407552                | -1.544081 | -2.059863 |
| 33               | 1                | 4.523770                | -2.459598 | -1.469023 |
| 34               | 1                | 3.424541                | -1.583076 | -2.542774 |
| 35               | 1                | 5.165179                | -1.558548 | -2.852363 |
| 36               | 6                | 4.408419                | 1.544945  | -2.058843 |
| 37               | 1                | 4.525002                | 2.460006  | -1.467365 |
| 38               | 1                | 5.166169                | 1.559578  | -2.851223 |
| 39               | 1                | 3.425492                | 1.584738  | -2.541857 |
| 40               | 6                | -4.360877               | -2.928092 | -0.658846 |
| 41               | 1                | -5.105881               | -2.545255 | 0.046212  |
| 42               | 1                | -4.607287               | -2.510475 | -1.640151 |
| 43               | 1                | -4.440190               | -4.016594 | -0.703967 |
| 44               | 6                | -4.360789               | 2.928210  | -0.658725 |
| 45               | 1                | -4.607164               | 2.510810  | -1.640136 |
| 46               | 1                | -5.105807               | 2.545204  | 0.046219  |
| 47               | 1                | -4.440112               | 4.016721  | -0.703627 |
| 48               | 6                | 0.534034                | 3.123203  | 0.829544  |
| 49               | 1                | 0.824409                | 2.794956  | 1.832274  |
| 50               | 1                | 1.330402                | 2.804053  | 0.150357  |
| 51               | 1                | 0.504675                | 4.216459  | 0.826776  |
| 52               | 6                | 0.533957                | -3.123303 | 0.829371  |
| 53               | 1                | 1.330123                | -2.804454 | 0.149793  |
| 54               | 1                | 0.824743                | -2.794806 | 1.831893  |
| 55               | 1                | 0.504455                | -4.216556 | 0.826911  |

**Table S7.** Computed Structure of **9**.  
**9** Energy = -1478.46797979 a.u. (-40230.59 eV)

| Center<br>Number | Atomic<br>Number | X         | Y         | Z         |
|------------------|------------------|-----------|-----------|-----------|
| 1                | 7                | 1.994667  | -1.238982 | -0.142242 |
| 2                | 7                | 1.946029  | 1.253352  | -0.198245 |
| 3                | 5                | 2.843557  | 0.031031  | 0.138455  |
| 4                | 9                | 3.220740  | 0.068884  | 1.492956  |
| 5                | 9                | 3.989180  | 0.035854  | -0.672163 |
| 6                | 6                | -4.190458 | -0.161531 | -1.860482 |
| 7                | 6                | -3.168719 | -0.193563 | -2.808734 |
| 8                | 1                | -3.397643 | -0.249293 | -3.869132 |
| 9                | 6                | -1.841501 | -0.155454 | -2.381511 |
| 10               | 1                | -1.036275 | -0.183680 | -3.111023 |
| 11               | 6                | -1.521130 | -0.081443 | -1.017792 |
| 12               | 6                | -2.541202 | -0.046561 | -0.032669 |
| 13               | 6                | -3.870815 | -0.091815 | -0.502158 |
| 14               | 1                | -4.688503 | -0.073878 | 0.211611  |
| 15               | 6                | -0.063668 | -0.044106 | -0.667330 |
| 16               | 6                | 0.636739  | -1.250634 | -0.493702 |
| 17               | 6                | 0.227232  | -2.621591 | -0.610322 |
| 18               | 6                | 1.355469  | -3.384197 | -0.323325 |
| 19               | 1                | 1.413955  | -4.464786 | -0.318533 |
| 20               | 6                | 2.426402  | -2.512751 | -0.035033 |
| 21               | 6                | 0.591253  | 1.195565  | -0.557872 |
| 22               | 6                | 0.139852  | 2.541261  | -0.777244 |
| 23               | 6                | 1.238738  | 3.358794  | -0.529410 |
| 24               | 1                | 1.262375  | 4.438422  | -0.599806 |
| 25               | 6                | 2.334425  | 2.544858  | -0.172990 |
| 26               | 1                | -5.230900 | -0.192540 | -2.171656 |
| 27               | 14               | -2.286772 | 0.095116  | 1.868001  |
| 28               | 6                | -3.937885 | -0.319964 | 2.704729  |
| 29               | 1                | -3.795290 | -0.308946 | 3.791924  |
| 30               | 1                | -4.726540 | 0.405347  | 2.475801  |
| 31               | 1                | -4.304642 | -1.316369 | 2.433097  |
| 32               | 6                | -1.819553 | 1.864066  | 2.352239  |
| 33               | 1                | -0.857316 | 2.168045  | 1.929473  |
| 34               | 1                | -2.577216 | 2.586259  | 2.027606  |
| 35               | 1                | -1.741415 | 1.934784  | 3.444015  |
| 36               | 6                | -0.991328 | -1.100542 | 2.549715  |
| 37               | 1                | -1.177322 | -2.134114 | 2.238917  |
| 38               | 1                | 0.028645  | -0.840032 | 2.255570  |
| 39               | 1                | -1.036228 | -1.071801 | 3.645654  |
| 40               | 6                | 3.828504  | -2.875152 | 0.331140  |
| 41               | 1                | 3.919053  | -3.958359 | 0.439311  |
| 42               | 1                | 4.531281  | -2.534982 | -0.436596 |
| 43               | 1                | 4.124868  | -2.395769 | 1.269222  |
| 44               | 6                | 3.720345  | 2.976707  | 0.178881  |
| 45               | 1                | 4.439826  | 2.615069  | -0.563091 |
| 46               | 1                | 3.773372  | 4.066895  | 0.222464  |
| 47               | 1                | 4.025599  | 2.564321  | 1.145556  |
| 48               | 6                | -1.110440 | -3.195758 | -0.974853 |
| 49               | 1                | -1.909734 | -2.835385 | -0.321170 |
| 50               | 1                | -1.402373 | -2.937853 | -1.997900 |
| 51               | 1                | -1.073332 | -4.286227 | -0.899977 |
| 52               | 6                | -1.204295 | 3.042450  | -1.217707 |
| 53               | 1                | -1.466067 | 2.681235  | -2.217354 |
| 54               | 1                | -2.007693 | 2.726054  | -0.547474 |
| 55               | 1                | -1.195404 | 4.135737  | -1.245955 |
